# Supplementary material
Source: PubMed Central journal article supplement (PMC4196616)
Supplement: 6d43f084834fbc8086f59664dcbd236c_genetics.114.166538-5.pdf [file 6d43f084834fbc8086f59664dcbd236c_genetics.114.166538-5.pdf]

**Table S5** Amino acid composition (%) of NM domains.

|                      |          |    | N  | Q  | N+Q | D+E+<br>K+R | F+Y+W | I+L+V | A+G | S+T | P  |
|----------------------|----------|----|----|----|-----|-------------|-------|-------|-----|-----|----|
| <i>S. cerevisiae</i> | 1-123    | N  | 16 | 28 | 45  | 4           | 19    | 1     | 22  | 4   | 5  |
|                      | M124-253 | M  | 5  | 5  | 10  | 42          | 1     | 15    | 8   | 16  | 6  |
| <i>C. albicans-1</i> | 1-141    | N  | 13 | 38 | 51  | 5           | 15    | 2     | 17  | 6   | 3  |
|                      | M142-299 | M  | 2  | 4  | 6   | 30          | 1     | 9     | 21  | 23  | 9  |
| <i>C. albicans-2</i> | 1-141    | N  | 13 | 38 | 51  | 5           | 15    | 2     | 17  | 6   | 3  |
|                      | 142-291  | M  | 2  | 5  | 7   | 32          | 1     | 10    | 19  | 21  | 9  |
| <i>K. lactis</i>     | 1-137    | N  | 15 | 28 | 43  | 4           | 17    | 0     | 25  | 4   | 4  |
|                      | M138-267 | M  | 4  | 4  | 8   | 38          | 1     | 13    | 14  | 21  | 5  |
| <i>D. hansenii</i>   | 1-132    | N  | 18 | 27 | 45  | 7           | 17    | 2     | 17  | 8   | 3  |
|                      | M133-271 | M  | 3  | 4  | 7   | 32          | 1     | 11    | 19  | 22  | 8  |
| <i>C. maltosa</i>    | 1-144    | N  | 13 | 36 | 49  | 5           | 15    | 3     | 16  | 6   | 6  |
|                      | M145-282 | M  | 1  | 4  | 5   | 29          | 1     | 13    | 21  | 20  | 10 |
| <i>A. gossypii</i>   | 1-142    | N  | 10 | 27 | 37  | 6           | 17    | 3     | 25  | 7   | 4  |
|                      | E143-259 | M  | 1  | 1  | 2   | 39          | 0     | 14    | 21  | 18  | 7  |
| <i>S. pombe</i>      | 1-232    | NM | 4  | 6  | 11  | 22          | 5     | 10    | 19  | 19  | 13 |
| <i>A. nidulans</i>   | 1-113    | N  | 6  | 23 | 29  | 7           | 18    | 4     | 25  | 6   | 9  |
|                      | S114-264 | M  | 1  | 3  | 5   | 26          | 0     | 9     | 29  | 19  | 11 |
| <i>A. fumigatus</i>  | 1-138    | N  | 5  | 22 | 27  | 7           | 14    | 4     | 25  | 8   | 12 |
|                      | T139-269 | M  | 2  | 2  | 3   | 21          | 0     | 9     | 29  | 28  | 9  |
| <i>M. grisea</i>     | 1-142    | N  | 6  | 29 | 36  | 6           | 14    | 3     | 28  | 6   | 6  |
|                      | A143-292 | M  | 1  | 2  | 3   | 32          | 0     | 9     | 32  | 15  | 9  |
| <i>C. neoformans</i> | 1-101    | N  | 2  | 23 | 25  | 6           | 17    | 2     | 24  | 6   | 20 |
|                      | A102-301 | M  | 2  | 1  | 3   | 21          | 1     | 12    | 33  | 19  | 12 |
| <i>U. maydis</i>     | 1-103    | N  | 9  | 32 | 41  | 0           | 17    | 2     | 26  | 5   | 8  |
|                      | A104-294 | M  | 1  | 2  | 3   | 21          | 0     | 12    | 30  | 24  | 10 |
| <i>N. crassa</i>     | 1-138    | N  | 7  | 30 | 37  | 7           | 15    | 3     | 27  | 5   | 5  |
|                      | N139-292 | M  | 1  | 4  | 5   | 29          | 0     | 13    | 28  | 14  | 10 |
| <i>C. glabrata</i>   | 1-126    | N  | 17 | 50 | 66  | 6           | 22    | 0     | 21  | 2   | 4  |
|                      | M127-251 | M  | 2  | 5  | 7   | 38          | 1     | 10    | 6   | 14  | 5  |
