# Supplementary material
Source: PubMed Central journal article supplement (PMC4196616)
Supplement: 9b4e39b1daedaf7a218a21d4bce82dc6_genetics.114.166538-12.pdf [file 9b4e39b1daedaf7a218a21d4bce82dc6_genetics.114.166538-12.pdf]

**Table S4. Cytoconduction of [PSI+han] and [PSI+mal] into plasmid-based and integrated recipients.** Using the plasmid-based system, we isolated putative [PSI+species] and used these as donors to strains expressing the same hybrid Sup35s either on a plasmid or integrated at the normal *SUP35* locus. 'Total' indicates the number of Ade+ isolates tested by cytoconduction, and 'Ade+' shows the number which showed transmission to the recipient.

|               |        |           | Ade+                | Recipient | Ade+ | Total | Recipient  | Ade+ | Total |
|---------------|--------|-----------|---------------------|-----------|------|-------|------------|------|-------|
|               |        |           | per 10 <sup>6</sup> | plasmid   |      |       | integrated |      |       |
| C. albicans-1 | pH610  | vector    | 17                  | YHE1430   | 0    | 48    | YHE1387    | 0    | 48    |
| YAG1          | pH952  | NM cer    | 23                  |           | 2    | 47    |            | 0    | 47    |
|               | pH1361 | NM alb1   | 33,000              |           | 19   | 48    |            | 8    | 48    |
|               | pH1344 | NM alb1+C | 9,700               |           | 15   | 48    |            | 11   | 48    |
| K. lactis     | pH610  | vector    | 69                  | YHE1435   | 0    | 48    | YHE1425    | 0    | 48    |
| YAG2          | pH952  | NM cer    | 73                  |           | 0    | 48    |            | 0    | 48    |
|               | pAG105 | NM lac    | 63                  |           | 0    | 48    |            | 0    | 48    |
|               | pH1345 | NM lac+C  | 45                  |           | 0    | 96    |            | 0    | 96    |
| D. hansenii   | pH610  | vector    | 2                   | YHE1432   | 0    | 48    | YHE1385    | 0    | 46    |
| YAG9          | pH952  | NM cer    | 6                   |           | 0    | 48    |            | 0    | 47    |
|               | pAG184 | NM han    | 4,620               |           | 75   | 188   |            | 83   | 192   |
|               | pH1346 | NM han+C  | 22,000              |           | 27   | 48    |            | 31   | 48    |
| C. maltosa    | pH610  | vector    | 6                   | YHE1434   | 0    | 48    | YHE1389    | 0    | 48    |
| YAG11         | pH952  | NM cer    | 6                   |           | 0    | 48    |            | 0    | 48    |
|               | pCW025 | NM mal    | 7,500               |           | 2    | 47    |            | 5    | 143   |
|               | pH1347 | NM mal+C  | 2,800               |           | 0    | 48    |            | 3    | 143   |
| A. gossypii   | pH610  | vector    | 4                   | YHE1433   | 0    | 48    | YHE1391    | 0    | 48    |
| YAG12         | pH952  | NM cer    | 3                   |           | 0    | 47    |            | 0    | 47    |
|               | pAG56  | NM gos    | 3                   |           | 0    | 80    |            | 0    | 80    |
|               | pH1349 | NM gos+C  | 1                   |           | 0    | 25    |            | 0    | 25    |
| S. pombe      | pH610  | vector    | 1                   | YHE1436   | 0    | 23    | YHE1383    | 0    | 23    |
| YAG7          | pH952  | NM cer    | 3                   |           | 0    | 34    |            | 0    | 35    |
|               | pAG173 | NM pom    | 1                   |           | 0    | 8     |            | 0    | 8     |
|               | pH1359 | NM pom+C  | 1                   |           | 0    | 7     |            | 0    | 7     |
