# Supplementary material
Source: PubMed Central journal article supplement (PMC4196616)
Supplement: a7af2675541fe57f556d180dee532cf3_genetics.114.166538-6.pdf [file a7af2675541fe57f556d180dee532cf3_genetics.114.166538-6.pdf]

**Table S3.** Plasmids used in this study.

| Species                     | LEU2 CEN<br>P <sub>SUP35</sub><br>NM+C | TRP1 2 $\mu$<br>P <sub>GAL1</sub> NM | TRP1 2 $\mu$<br>P <sub>GAL1</sub><br>NM+C | LEU2 2 $\mu$<br>P <sub>GAL1</sub><br>NM-GFP | LEU2 2 $\mu$<br>P <sub>GAL1</sub> NM | LEU2 2 $\mu$<br>P <sub>GAL1</sub><br>NM+C | pET21a(+)<br>NM-His6 | Integrative<br>NM+C |
|-----------------------------|----------------------------------------|--------------------------------------|-------------------------------------------|---------------------------------------------|--------------------------------------|-------------------------------------------|----------------------|---------------------|
| <b><i>S. cerevisiae</i></b> | pH953                                  | pH952                                | pH1337                                    | pAZ17                                       | pHK006                               | pH1294                                    | p1339                | pCW046              |
| <b><i>C. albicans 1</i></b> | p988A                                  | pH1361                               | pH1344                                    | pH1301                                      | pHK007                               | pH1295                                    | pH1167               | pCW047              |
| <b><i>C. albicans 2</i></b> | p981A                                  | p987A                                | pH1343                                    | pH1302                                      |                                      |                                           | pH1168               | pCW048              |
| <b><i>K. lactis</i></b>     | pAG132                                 | pAG105                               | pH1345                                    | pAZ015                                      | pHK016                               | pH1296                                    | pH1177               | pCW051              |
| <b><i>D. hansenii</i></b>   | pAG187                                 | pAG184                               | pH1346                                    | pH1306                                      | pHK011                               | pH1298                                    | pH1179               | pCW055              |
| <b><i>C. maltosa</i></b>    | pAG87                                  | pCW025                               | pH1347                                    | pH1309                                      | pHK012                               | pH1299                                    | pH1172               | pCW057              |
| <b><i>A. nidulans</i></b>   | pAG175                                 | pAG178                               | pH1348                                    | pH1312                                      |                                      |                                           | pH1178               | pCW053              |
| <b><i>C. glabrata</i></b>   | pAG91                                  | pAG64                                |                                           | pH1308                                      |                                      |                                           | pH1171               | pCW056              |
| <b><i>N. crassa</i></b>     | pAG199                                 | pAG192                               |                                           | pH1307                                      |                                      |                                           | pH1174               | pCW059              |
| <b><i>M. grisea</i></b>     | pH1342                                 | p992A                                | pH1341                                    | pH1313                                      |                                      |                                           | pH1169               | pHK027*             |
| <b><i>A. fumigatus</i></b>  | pH977                                  | pH976                                | pH1339                                    | pH1304                                      |                                      |                                           | pH1170               | pCW050              |
| <b><i>S. pombe</i></b>      | pH1358                                 | pAG173                               | pH1360                                    | pH1311                                      | pHK010                               | pH1297                                    | pRMpombe             | pCW052              |
| <b><i>A. gossypii</i></b>   | pH1350                                 | pAG56                                | pH1349                                    | pH1310                                      | pHK018                               | pH1300                                    | pH1173               | pCW058              |
| <b><i>C. neoformans</i></b> | p991A                                  | pH990A                               | pH1340                                    | pH1305                                      |                                      |                                           | pH1175               | pCW060              |
| <b><i>U. maydis</i></b>     | pH950                                  | pH951                                | pH1338                                    | pH1303                                      |                                      |                                           | pH1176               | pHK026*             |

Backbone plasmids:

- p1103: *LEU2 CEN P<sub>SUP35</sub>*  
pH317: *LEU2 2 $\mu$  P<sub>GAL1</sub>* (EDSKES and WICKNER 2000)  
pH610: *TRP1 2 $\mu$  P<sub>GAL1</sub>* (KRYNDUSHKIN *et al.* 2011)  
pCW042: *SUP35* integrative constructs  
pHK025: *SUP35* integrative constructs marked with \*
