# Supplementary material
Source: PubMed Central journal article supplement (PMC4196616)
Supplement: a904eea8d8773ac553ac7763ce4372a4_genetics.114.166538-3.pdf [file a904eea8d8773ac553ac7763ce4372a4_genetics.114.166538-3.pdf]

Schizosaccharomyces pombe

G \* \* S A K \* R \* T G \* A T R Q A D F \* F1  
 M A S N Q P N N G E Q D E Q L A K Q T S F2  
 W L V I S Q I T V N R M S N S P S R L L F3  
 1 ATGGCTAGTAATCAGCCAAATAACGGTGAACAGGATGAGCAACTCGCCAAGCAGACTTCT 60  
  
 T V D V C K G T Y V Y A \* S C S L H S F F1  
 K L S M S A K A P T F T P K A A P F I P F2  
 N C R C L Q R H L R L R L K L L P S F L F3  
 61 AAAGTGTGATGTCTGCAAAGGCACCTACGTTTACGCCTAAAGCTGCTCCCTTCATTCT 120  
  
 F P T Y V F \* L E H H P Y V L R \* L L V F1  
 S F Q R T F F N \* N T I H M S \* D D C L F2  
 L S N V R F L I R T P S I C L E M I A C F3  
 121 TCTTTCCAACGTACGTTTTTTAATTAGAACACCATCCATATGTCTTGAGATGATTGCTTG 180  
  
 L S K K I I N F L L G P G F V P V N N I F1  
 F \* V K K L L T S C \* A P D L Y L \* T I F2  
 F K \* K N Y \* L L A R P R I C T C E Q Y F3  
 181 TTTTAAGTAAAAAATTATTAACCTTCTTGCTAGGCCCCCGATTGTGTACCTGTGAACAATA 240  
  
 A G G Y P Y A Q Y T G Q G Q N S N S P H F1  
 L L V V I L M P N I Q A K D K T A T R H F2  
 C W W L S L C P I Y R P R T K Q Q L A T F3  
 241 TTGCTGGTGGTTATCCTTATGCCAATATACAGGCCAAGGACAAAACAGCAACTCGCCAC 300

Neurospora crassa

M S G N V Q N N W E E A A D Q D E R L A F1  
 C P E T F R T T G R R L P T R M S A W R F2  
 V R K R S E Q L G G G C R P G \* A P G A F3  
 1 ATGTCCGGAAACGTTTCAGAACAACCTGGGAGGAGGCTGCCGACCAGGATGAGCGCCTGGCG 60  
  
 R Q T Q Q Q M N I N A G T F R P G A A A F1  
 A R P S N R \* T S T L V P S A P V P L P F2  
 P D P A T D E H Q R W Y L P P R C R C L F3  
 61 CGCCAGACCCAGCAACAGATGAACATCAACGCTGGTACCTTCCGCCCCGGTGCCGCTGCC 120  
  
 F T P G A P S F T P G Q F A A P G F T P F1  
 S P P A P P P S P P A S S P L P A S L P F2  
 H P R R P L L H P R P V R R S R L H S P F3  
 121 TTCACCCCCGGCGCCCCCTCCTTACCCCCGGCCAGTTCGCCGCTCCCGGCTTCACTCCC 180  
  
 Q Y Q Q Q Y Y G G A Q Q G Y G G G Y P Q F1  
 S T S S N I T A A P S R A T A V A T P S F2  
 V P A A I L R R R P A G L R R W L P P V F3  
 181 CAGTACCAGCAGCAATATTACGGCGGGCGCCAGCAGGGCTACGGCGGTGGCTACCCCCAG 240  
  
 Y G Q Q G Y G Q Y N N Q Q Q Q G Y G A V F1  
 T A S R A T D S T T T S S S R A M A L F F2  
 R P A G L R T V Q Q P A A A G L W R C L F3  
 241 TACGGCCAGCAGGGCTACGGACAGTACAACAACCAGCAGCAGCAGGGCTATGGCGCTGTT 300

```

Y G Q Q G Y N Q G Y G R P P L V R T V F F1
T A S R D I T R A T V G R R L F V Q S L F2
R P A G I * P G L R * A A A C S Y S L * F3
301 TACGGCCAGCAGGGATATAACCAGGGCTACGGTAGGCCGCGCTTGTTTCGTACAGTCTTT 360

D R G I * L I D V D S R P T T T T T T T F1
I E E S N * * T W I A G Q Q Q Q Q Q Q Q F2
S R N L T D R R G * Q A N N N N N N N N F3
361 GATCGAGGAATCTAACTGATAGACGTGGATAGCAGGCCAACAACAACAACAACAACA 420

T T I R W L P A E P G L P A E A T A E P F1
Q Q Y G G Y Q Q N Q G Y Q Q R Q Q Q N R F2
N N T V V T S R T R A T S R G N S R T A F3
421 ACAACAATACGGTGGTTACCAGCAGAACCAGGGCTACCAGCAGAGGCAACAGCAGAACCG 480

```

**Figure S3** Introns (**ATGC**) removed from NM domains of *S. pombe* and *N. crassa SUP35*.
