# Supplementary material
Source: PubMed Central journal article supplement (PMC4196616)
Supplement: cb7bbb8b931fafc5c9b864edf4021146_genetics.114.166538-1.pdf [file cb7bbb8b931fafc5c9b864edf4021146_genetics.114.166538-1.pdf]

**Table S2.** Strains in columns 1) and 2) are strains YHE1223 and YHE1407 with the corresponding plasmid from column 2) of Table S3 replacing pJ533. Strains in column 3) were derived from strain YHE1223 by integrative recombination of *SUP35NMspecies+C* replacing *sup35::kanMX*. Strains in column 4) were derived from strain HJK001 by integration of the corresponding *SUP35NMspecies+C* construct, followed by meiotic crosses.

| Species source of Sup35NM   | 1) SUP35 deletion strain with LEU2 CEN P <sub>SUP35</sub> NM+C | 2) For cytoduction: <i>sup35Δ</i> strain with LEU2 CEN P <sub>SUP35</sub> NM+C | 3) SUP35 integrated strain | 4) For cytoduction: SUP35 integrated strain |
|-----------------------------|----------------------------------------------------------------|--------------------------------------------------------------------------------|----------------------------|---------------------------------------------|
| <b><i>S. cerevisiae</i></b> | YHE1227                                                        | YHE1409                                                                        | HJK088                     | YAZ013                                      |
| <b><i>C. albicans1</i></b>  | YAG1                                                           | YHE1430                                                                        | HJK089                     | YHE1387                                     |
| <b><i>C. albicans2</i></b>  | YAG2                                                           | YHE1431                                                                        |                            |                                             |
| <b><i>K. lactis</i></b>     | YAG5                                                           | YHE1435                                                                        | HJK092                     | YHE1425                                     |
| <b><i>D. hansenii</i></b>   | YAG9                                                           | YHE1432                                                                        |                            | YHE1385                                     |
| <b><i>C. maltosa</i></b>    | YAG11                                                          | YHE1434                                                                        | HJK122                     | YHE1389                                     |
| <b><i>A. nidulans</i></b>   | YAG6                                                           | YHE1459                                                                        |                            |                                             |
| <b><i>C. glabrata</i></b>   | YAG10                                                          |                                                                                |                            |                                             |
| <b><i>N. crassa</i></b>     | YAG13                                                          |                                                                                |                            |                                             |
| <b><i>M. grisea</i></b>     | YAG3                                                           | YHE1412                                                                        |                            |                                             |
| <b><i>A. fumigatus</i></b>  | YAG4                                                           | YHE1411                                                                        |                            |                                             |
| <b><i>S. pombe</i></b>      | YAG7                                                           | YHE1436                                                                        | HJK110                     | YHE1383                                     |
| <b><i>A. gossypii</i></b>   | YAG12                                                          | YHE1433                                                                        | HJK111                     | YHE1391                                     |
| <b><i>C. neoformans</i></b> | YAG14                                                          | YHE1410                                                                        |                            |                                             |
| <b><i>U. maydis</i></b>     | YHE1228                                                        | YHE1413                                                                        |                            |                                             |
